# Supplementary material
Source: publisher figshare collection journal article supplement (https://acs.figshare.com/ndownloader/files/4104562)
Supplement: Supplementary file 1 [file 4104562]

 
data_xn12009-md404
 
_audit_creation_method            SHELXL-97
_chemical_name_systematic
;
 ?
;
_chemical_name_common             ?
_chemical_melting_point           ?
_chemical_formula_moiety          
 'C24 H18 N4 O8 Ru3'
_chemical_formula_sum
 'C24 H18 N4 O8 Ru3'
_chemical_formula_weight          793.63
 
loop_
 _atom_type_symbol
 _atom_type_description
 _atom_type_scat_dispersion_real
 _atom_type_scat_dispersion_imag
 _atom_type_scat_source
 'C'  'C'   0.0181   0.0091
 'International Tables Vol C Tables 4.2.6.8 and 6.1.1.4'
 'H'  'H'   0.0000   0.0000
 'International Tables Vol C Tables 4.2.6.8 and 6.1.1.4'
 'N'  'N'   0.0311   0.0180
 'International Tables Vol C Tables 4.2.6.8 and 6.1.1.4'
 'O'  'O'   0.0492   0.0322
 'International Tables Vol C Tables 4.2.6.8 and 6.1.1.4'
 'Ru'  'Ru'   0.0552   3.2960
 'International Tables Vol C Tables 4.2.6.8 and 6.1.1.4'
 
_symmetry_cell_setting            'monoclinic'
_symmetry_space_group_name_H-M    'P21/c'
_symmetry_space_group_name_Hall   '-P 2ybc'
 
loop_
 _symmetry_equiv_pos_as_xyz
 'x, y, z'
 '-x, y+1/2, -z+1/2'
 '-x, -y, -z'
 'x, -y-1/2, z-1/2'
 
_cell_length_a                    13.7947(3)
_cell_length_b                    8.3567(2)
_cell_length_c                    22.6665(5)
_cell_angle_alpha                 90.00
_cell_angle_beta                  97.733(2)
_cell_angle_gamma                 90.00
_cell_volume                      2589.19(10)
_cell_formula_units_Z             4
_cell_measurement_temperature     123.00(10)
_cell_measurement_reflns_used     4513
_cell_measurement_theta_min       3.2304
_cell_measurement_theta_max       74.5072
 
_exptl_crystal_description        fragment
_exptl_crystal_colour             orange
_exptl_crystal_size_max                            0.1036
_exptl_crystal_size_mid                            0.0216
_exptl_crystal_size_min                            0.0174
_exptl_crystal_density_meas       ?
_exptl_crystal_density_diffrn     2.036
_exptl_crystal_density_method     'not measured'
_exptl_crystal_F_000              1544
_exptl_absorpt_coefficient_mu     14.490
_exptl_absorpt_correction_type    'multi-scan'
_exptl_absorpt_correction_T_min                   0.57776
_exptl_absorpt_correction_T_max                   1.00000
_exptl_absorpt_process_details  
;
CrysAlisPro, Agilent Technologies,
Version 1.171.35.19 (release 27-10-2011 CrysAlis171 .NET)
(compiled Oct 27 2011,15:02:11)
Empirical absorption correction using spherical harmonics,
 implemented in SCALE3 ABSPACK scaling algorithm.
;  
 
_exptl_special_details
;
 ?
;
 
_diffrn_ambient_temperature       123.00(10)
_diffrn_radiation_wavelength      1.54180
_diffrn_radiation_type            CuK\a
_diffrn_radiation_source          'Nova (Cu) X-ray Source'
_diffrn_radiation_monochromator   'mirror'
_diffrn_measurement_device_type   'Xcalibur, Onyx, Nova'
_diffrn_measurement_method        ?
_diffrn_detector_area_resol_mean  ?
_diffrn_standards_number          ?
_diffrn_standards_interval_count  ?
_diffrn_standards_interval_time   ?
_diffrn_standards_decay_%         ?
_diffrn_reflns_number             9138
_diffrn_reflns_av_R_equivalents   0.0304
_diffrn_reflns_av_sigmaI/netI     0.0408
_diffrn_reflns_limit_h_min        -16
_diffrn_reflns_limit_h_max        13
_diffrn_reflns_limit_k_min        -10
_diffrn_reflns_limit_k_max        9
_diffrn_reflns_limit_l_min        -27
_diffrn_reflns_limit_l_max        20
_diffrn_reflns_theta_min          3.23
_diffrn_reflns_theta_max          69.98
_reflns_number_total              4845
_reflns_number_gt                 4133
_reflns_threshold_expression      >2\s(I)
 
_computing_data_collection        
;
CrysAlisPro, Agilent Technologies,
Version 1.171.35.19 (release 27-10-2011 CrysAlis171 .NET)
(compiled Oct 27 2011,15:02:11)
;
_computing_cell_refinement        
;
CrysAlisPro, Agilent Technologies,
Version 1.171.35.19 (release 27-10-2011 CrysAlis171 .NET)
(compiled Oct 27 2011,15:02:11)
;
_computing_data_reduction         
;
CrysAlisPro, Agilent Technologies,
Version 1.171.35.19 (release 27-10-2011 CrysAlis171 .NET)
(compiled Oct 27 2011,15:02:11)
;
_computing_structure_solution     'SIR-97 (Giacovazzo, 1999)'
_computing_structure_refinement   'SHELXL-97 (Sheldrick, 2008)'
_computing_molecular_graphics     'PLATON (Spek, 2008)'
_computing_publication_material   'SHELXL-97 (Sheldrick, 2008)'
 
_refine_special_details
;
 Refinement of F^2^ against ALL reflections.  The weighted R-factor wR and
 goodness of fit S are based on F^2^, conventional R-factors R are based
 on F, with F set to zero for negative F^2^. The threshold expression of
 F^2^ > 2\s(F^2^) is used only for calculating R-factors(gt) etc. and is
 not relevant to the choice of reflections for refinement.  R-factors based
 on F^2^ are statistically about twice as large as those based on F, and R-
 factors based on ALL data will be even larger.
;
 
_refine_ls_structure_factor_coef  Fsqd
_refine_ls_matrix_type            full
_refine_ls_weighting_scheme       calc
_refine_ls_weighting_details
 'calc w=1/[\s^2^(Fo^2^)+(0.0388P)^2^+0.0000P] where P=(Fo^2^+2Fc^2^)/3'
_atom_sites_solution_primary      direct
_atom_sites_solution_secondary    difmap
_atom_sites_solution_hydrogens    geom
_refine_ls_hydrogen_treatment     mixed
_refine_ls_extinction_method      none
_refine_ls_extinction_coef        ?
_refine_ls_number_reflns          4845
_refine_ls_number_parameters      362
_refine_ls_number_restraints      0
_refine_ls_R_factor_all           0.0360
_refine_ls_R_factor_gt            0.0282
_refine_ls_wR_factor_ref          0.0742
_refine_ls_wR_factor_gt           0.0697
_refine_ls_goodness_of_fit_ref    1.003
_refine_ls_restrained_S_all       1.003
_refine_ls_shift/su_max           0.001
_refine_ls_shift/su_mean          0.000
 
loop_
 _atom_site_label
 _atom_site_type_symbol
 _atom_site_fract_x
 _atom_site_fract_y
 _atom_site_fract_z
 _atom_site_U_iso_or_equiv
 _atom_site_adp_type
 _atom_site_occupancy
 _atom_site_symmetry_multiplicity
 _atom_site_calc_flag
 _atom_site_refinement_flags
 _atom_site_disorder_assembly
 _atom_site_disorder_group
C1 C 0.7690(3) 0.0101(5) 0.73755(16) 0.0201(8) Uani 1 1 d . . .
C2 C 0.6529(4) 0.2229(6) 0.6924(2) 0.0351(11) Uani 1 1 d . . .
H2A H 0.5980 0.1630 0.6734 0.053 Uiso 1 1 calc R . .
H2B H 0.6616 0.3171 0.6694 0.053 Uiso 1 1 calc R . .
H2C H 0.6412 0.2534 0.7316 0.053 Uiso 1 1 calc R . .
C3 C 0.8083(3) 0.1410(5) 0.65669(18) 0.0263(9) Uani 1 1 d . . .
H3 H 0.8044 0.2109 0.6245 0.032 Uiso 1 1 calc R . .
C4 C 0.8807(3) 0.0359(6) 0.67382(18) 0.0275(9) Uani 1 1 d . . .
H4 H 0.9370 0.0200 0.6562 0.033 Uiso 1 1 calc R . .
C5 C 0.9214(3) -0.1505(5) 0.76005(18) 0.0228(8) Uani 1 1 d . . .
H5A H 0.9675 -0.1977 0.7363 0.027 Uiso 1 1 calc R . .
H5B H 0.8840 -0.2365 0.7748 0.027 Uiso 1 1 calc R . .
C6 C 0.9766(3) -0.0620(5) 0.81192(18) 0.0214(8) Uani 1 1 d . . .
C7 C 1.0735(3) -0.0198(5) 0.80783(18) 0.0230(8) Uani 1 1 d . . .
H7 H 1.0995 -0.0419 0.7729 0.028 Uiso 1 1 calc R . .
C8 C 1.1316(3) 0.0541(5) 0.8545(2) 0.0266(9) Uani 1 1 d . . .
H8 H 1.1955 0.0841 0.8508 0.032 Uiso 1 1 calc R . .
C9 C 1.0926(3) 0.0826(5) 0.90659(19) 0.0261(9) Uani 1 1 d . . .
H9 H 1.1311 0.1275 0.9392 0.031 Uiso 1 1 calc R . .
C10 C 0.9961(3) 0.0440(5) 0.91007(18) 0.0259(9) Uani 1 1 d . . .
H10 H 0.9711 0.0650 0.9454 0.031 Uiso 1 1 calc R . .
C11 C 0.9346(3) -0.0250(5) 0.86314(17) 0.0205(8) Uani 1 1 d . . .
C12 C 0.8281(3) -0.0537(5) 0.87140(17) 0.0193(8) Uani 1 1 d . . .
C13 C 0.9023(3) -0.2888(5) 0.93645(19) 0.0259(9) Uani 1 1 d . . .
H13 H 0.9624 -0.2975 0.9224 0.031 Uiso 1 1 calc R . .
C14 C 0.8689(3) -0.3823(5) 0.97781(19) 0.0274(9) Uani 1 1 d . . .
H14 H 0.9018 -0.4676 0.9978 0.033 Uiso 1 1 calc R . .
C15 C 0.7511(3) -0.2010(5) 0.94780(17) 0.0210(8) Uani 1 1 d . . .
C16 C 0.7178(4) -0.3934(6) 1.0284(2) 0.0330(10) Uani 1 1 d . . .
H16A H 0.6816 -0.3089 1.0440 0.049 Uiso 1 1 calc R . .
H16B H 0.7602 -0.4427 1.0603 0.049 Uiso 1 1 calc R . .
H16C H 0.6732 -0.4718 1.0094 0.049 Uiso 1 1 calc R . .
C101 C 0.6557(3) 0.3379(6) 0.89313(18) 0.0277(9) Uani 1 1 d . . .
C102 C 0.8118(3) 0.1984(5) 0.96848(18) 0.0236(9) Uani 1 1 d . . .
C103 C 0.8402(3) 0.2954(5) 0.85500(18) 0.0245(9) Uani 1 1 d . . .
C201 C 0.7154(3) -0.2917(6) 0.78524(18) 0.0258(9) Uani 1 1 d . . .
C202 C 0.5709(3) -0.0635(6) 0.75913(19) 0.0289(9) Uani 1 1 d . . .
C301 C 0.6455(3) 0.0285(6) 1.0022(2) 0.0275(9) Uani 1 1 d . . .
C302 C 0.5377(3) -0.2424(6) 0.94301(19) 0.0277(9) Uani 1 1 d . . .
C303 C 0.5164(3) 0.0640(6) 0.8917(2) 0.0305(10) Uani 1 1 d . . .
N1 N 0.7406(3) 0.1247(4) 0.69641(14) 0.0241(7) Uani 1 1 d . . .
N2 N 0.8550(3) -0.0433(4) 0.72261(14) 0.0219(7) Uani 1 1 d . . .
N3 N 0.8295(2) -0.1766(4) 0.91878(14) 0.0202(7) Uani 1 1 d . . .
N4 N 0.7763(3) -0.3274(4) 0.98485(15) 0.0229(7) Uani 1 1 d . . .
O101 O 0.6050(3) 0.4418(4) 0.89518(17) 0.0424(9) Uani 1 1 d . . .
O102 O 0.8485(2) 0.2299(4) 1.01587(13) 0.0297(7) Uani 1 1 d . . .
O103 O 0.8955(2) 0.3761(4) 0.83698(15) 0.0367(8) Uani 1 1 d . . .
O201 O 0.7230(3) -0.4232(4) 0.77293(16) 0.0367(8) Uani 1 1 d . . .
O202 O 0.4946(3) -0.0641(5) 0.73350(16) 0.0471(10) Uani 1 1 d . . .
O301 O 0.6626(2) 0.0762(4) 1.04969(14) 0.0333(7) Uani 1 1 d . . .
O302 O 0.4840(2) -0.3353(4) 0.95533(16) 0.0367(8) Uani 1 1 d . . .
O303 O 0.4534(2) 0.1400(5) 0.87014(18) 0.0455(9) Uani 1 1 d . . .
Ru1 Ru 0.75047(2) 0.16442(4) 0.889853(13) 0.01930(8) Uani 1 1 d . . .
Ru2 Ru 0.69819(2) -0.07553(4) 0.805743(12) 0.01955(9) Uani 1 1 d . . .
Ru3 Ru 0.62389(2) -0.07153(4) 0.925848(13) 0.02088(9) Uani 1 1 d . . .
H100 H 0.681(4) 0.129(7) 0.825(3) 0.047(16) Uiso 1 1 d . . .
H200 H 0.623(5) -0.180(9) 0.856(3) 0.07(2) Uiso 1 1 d . . .
 
loop_
 _atom_site_aniso_label
 _atom_site_aniso_U_11
 _atom_site_aniso_U_22
 _atom_site_aniso_U_33
 _atom_site_aniso_U_23
 _atom_site_aniso_U_13
 _atom_site_aniso_U_12
C1 0.0195(18) 0.024(2) 0.0159(17) -0.0020(16) 0.0004(14) 0.0025(16)
C2 0.031(2) 0.041(3) 0.032(2) 0.008(2) -0.0002(19) 0.009(2)
C3 0.036(2) 0.026(2) 0.0174(18) 0.0003(16) 0.0034(17) -0.0053(18)
C4 0.028(2) 0.035(2) 0.0205(19) -0.0035(17) 0.0068(17) -0.0065(19)
C5 0.0203(19) 0.026(2) 0.0230(19) -0.0037(16) 0.0065(16) 0.0040(16)
C6 0.0199(19) 0.021(2) 0.0228(19) 0.0020(16) 0.0000(15) 0.0038(16)
C7 0.022(2) 0.025(2) 0.0226(19) 0.0048(16) 0.0051(16) -0.0001(16)
C8 0.018(2) 0.028(2) 0.034(2) 0.0044(18) 0.0041(17) 0.0018(17)
C9 0.022(2) 0.027(2) 0.027(2) -0.0012(17) -0.0026(17) -0.0009(17)
C10 0.026(2) 0.030(2) 0.022(2) 0.0008(17) 0.0042(17) 0.0022(18)
C11 0.0186(19) 0.0225(19) 0.0203(18) 0.0024(15) 0.0018(15) 0.0029(15)
C12 0.022(2) 0.0176(18) 0.0190(18) 0.0005(15) 0.0044(15) -0.0003(15)
C13 0.024(2) 0.023(2) 0.030(2) -0.0010(17) 0.0025(17) 0.0018(17)
C14 0.026(2) 0.026(2) 0.031(2) 0.0023(18) 0.0020(17) 0.0018(18)
C15 0.0182(19) 0.024(2) 0.0206(18) 0.0011(16) 0.0013(15) -0.0038(15)
C16 0.034(2) 0.033(2) 0.033(2) 0.013(2) 0.0068(19) -0.001(2)
C101 0.024(2) 0.035(3) 0.024(2) -0.0002(18) 0.0038(17) 0.0042(19)
C102 0.029(2) 0.0180(19) 0.026(2) 0.0070(16) 0.0102(17) 0.0028(16)
C103 0.022(2) 0.027(2) 0.026(2) 0.0025(17) 0.0071(17) -0.0007(17)
C201 0.0171(19) 0.038(3) 0.0218(19) -0.0035(18) 0.0018(15) -0.0054(17)
C202 0.025(2) 0.040(3) 0.022(2) 0.0054(18) 0.0012(17) -0.0026(19)
C301 0.021(2) 0.030(2) 0.033(2) 0.0027(19) 0.0101(18) 0.0047(17)
C302 0.022(2) 0.035(2) 0.027(2) 0.0008(19) 0.0063(17) 0.0029(19)
C303 0.023(2) 0.032(2) 0.037(2) 0.002(2) 0.0078(19) 0.0002(19)
N1 0.0272(18) 0.0266(18) 0.0185(16) 0.0008(14) 0.0036(14) 0.0025(15)
N2 0.0221(17) 0.0249(18) 0.0188(16) -0.0013(13) 0.0025(13) 0.0002(14)
N3 0.0223(17) 0.0201(17) 0.0173(15) 0.0022(13) -0.0012(13) 0.0035(13)
N4 0.0229(17) 0.0231(17) 0.0223(16) 0.0029(14) 0.0012(13) 0.0008(14)
O101 0.041(2) 0.0343(19) 0.051(2) -0.0072(16) 0.0029(16) 0.0137(16)
O102 0.0340(17) 0.0334(17) 0.0210(15) -0.0011(13) 0.0011(12) -0.0004(14)
O103 0.0334(18) 0.0374(19) 0.0412(18) 0.0081(15) 0.0114(15) -0.0043(15)
O201 0.0353(18) 0.0248(18) 0.050(2) -0.0110(15) 0.0075(16) -0.0026(14)
O202 0.0230(18) 0.073(3) 0.042(2) 0.0103(19) -0.0083(15) -0.0052(17)
O301 0.0309(17) 0.045(2) 0.0254(16) -0.0069(14) 0.0089(13) 0.0017(14)
O302 0.0291(17) 0.0309(18) 0.053(2) 0.0039(16) 0.0153(15) -0.0010(15)
O303 0.0242(17) 0.050(2) 0.062(2) 0.0200(19) 0.0066(16) 0.0093(16)
Ru1 0.01824(15) 0.02103(15) 0.01903(14) 0.00067(11) 0.00402(11) 0.00119(12)
Ru2 0.01598(15) 0.02470(16) 0.01787(15) 0.00027(11) 0.00191(11) 0.00014(11)
Ru3 0.01765(15) 0.02430(16) 0.02154(15) 0.00233(12) 0.00569(11) 0.00070(12)
 
_geom_special_details
;
 All s.u.'s (except the s.u. in the dihedral angle between two l.s. planes)
 are estimated using the full covariance matrix.  The cell s.u.'s are taken
 into account individually in the estimation of s.u.'s in distances, angles
 and torsion angles; correlations between s.u.'s in cell parameters are only
 used when they are defined by crystal symmetry.  An approximate (isotropic)
 treatment of cell s.u.'s is used for estimating s.u.'s involving l.s. planes.
;
 
loop_
 _geom_bond_atom_site_label_1
 _geom_bond_atom_site_label_2
 _geom_bond_distance
 _geom_bond_site_symmetry_2
 _geom_bond_publ_flag
C1 N2 1.352(5) . ?
C1 N1 1.357(5) . ?
C1 Ru2 2.065(4) . ?
C2 N1 1.455(6) . ?
C3 C4 1.348(7) . ?
C3 N1 1.388(5) . ?
C4 N2 1.376(5) . ?
C5 N2 1.467(5) . ?
C5 C6 1.506(6) . ?
C6 C7 1.397(6) . ?
C6 C11 1.400(5) . ?
C7 C8 1.383(6) . ?
C8 C9 1.383(6) . ?
C9 C10 1.381(6) . ?
C10 C11 1.393(6) . ?
C11 C12 1.525(5) . ?
C12 N3 1.484(5) . ?
C12 Ru2 2.178(4) . ?
C12 Ru1 2.183(4) . ?
C13 C14 1.348(6) . ?
C13 N3 1.392(5) . ?
C14 N4 1.387(6) . ?
C15 N3 1.355(5) . ?
C15 N4 1.366(5) . ?
C15 Ru3 2.064(4) . ?
C16 N4 1.464(5) . ?
C101 O101 1.120(6) . ?
C101 Ru1 1.960(4) . ?
C102 O102 1.155(5) . ?
C102 Ru1 1.888(4) . ?
C103 O103 1.135(5) . ?
C103 Ru1 1.902(4) . ?
C201 O201 1.142(6) . ?
C201 Ru2 1.888(5) . ?
C202 O202 1.131(6) . ?
C202 Ru2 1.926(5) . ?
C301 O301 1.143(6) . ?
C301 Ru3 1.908(5) . ?
C302 O302 1.133(5) . ?
C302 Ru3 1.931(5) . ?
C303 O303 1.133(6) . ?
C303 Ru3 1.942(5) . ?
Ru1 Ru2 2.7939(4) . ?
Ru1 Ru3 2.8260(4) . ?
Ru2 Ru3 3.0354(4) . ?
 
loop_
 _geom_angle_atom_site_label_1
 _geom_angle_atom_site_label_2
 _geom_angle_atom_site_label_3
 _geom_angle
 _geom_angle_site_symmetry_1
 _geom_angle_site_symmetry_3
 _geom_angle_publ_flag
N2 C1 N1 104.0(3) . . ?
N2 C1 Ru2 126.3(3) . . ?
N1 C1 Ru2 129.6(3) . . ?
C4 C3 N1 106.6(4) . . ?
C3 C4 N2 106.5(4) . . ?
N2 C5 C6 111.2(3) . . ?
C7 C6 C11 120.4(4) . . ?
C7 C6 C5 117.4(4) . . ?
C11 C6 C5 122.2(4) . . ?
C8 C7 C6 121.5(4) . . ?
C7 C8 C9 118.5(4) . . ?
C10 C9 C8 119.8(4) . . ?
C9 C10 C11 123.1(4) . . ?
C10 C11 C6 116.5(4) . . ?
C10 C11 C12 118.0(3) . . ?
C6 C11 C12 125.5(4) . . ?
N3 C12 C11 106.2(3) . . ?
N3 C12 Ru2 111.4(3) . . ?
C11 C12 Ru2 130.3(3) . . ?
N3 C12 Ru1 113.5(2) . . ?
C11 C12 Ru1 113.4(3) . . ?
Ru2 C12 Ru1 79.68(14) . . ?
C14 C13 N3 106.8(4) . . ?
C13 C14 N4 107.1(4) . . ?
N3 C15 N4 105.1(3) . . ?
N3 C15 Ru3 120.8(3) . . ?
N4 C15 Ru3 133.8(3) . . ?
O101 C101 Ru1 176.9(4) . . ?
O102 C102 Ru1 175.4(4) . . ?
O103 C103 Ru1 176.6(4) . . ?
O201 C201 Ru2 178.0(4) . . ?
O202 C202 Ru2 176.0(4) . . ?
O301 C301 Ru3 173.9(4) . . ?
O302 C302 Ru3 175.2(4) . . ?
O303 C303 Ru3 177.7(5) . . ?
C1 N1 C3 111.0(3) . . ?
C1 N1 C2 127.0(3) . . ?
C3 N1 C2 122.0(4) . . ?
C1 N2 C4 111.9(4) . . ?
C1 N2 C5 123.9(3) . . ?
C4 N2 C5 123.4(3) . . ?
C15 N3 C13 110.6(3) . . ?
C15 N3 C12 121.5(3) . . ?
C13 N3 C12 127.8(3) . . ?
C15 N4 C14 110.3(3) . . ?
C15 N4 C16 126.0(4) . . ?
C14 N4 C16 123.6(4) . . ?
C102 Ru1 C103 94.11(18) . . ?
C102 Ru1 C101 93.98(18) . . ?
C103 Ru1 C101 93.69(19) . . ?
C102 Ru1 C12 97.89(16) . . ?
C103 Ru1 C12 92.16(16) . . ?
C101 Ru1 C12 166.35(17) . . ?
C102 Ru1 Ru2 142.51(12) . . ?
C103 Ru1 Ru2 104.61(13) . . ?
C101 Ru1 Ru2 116.39(13) . . ?
C12 Ru1 Ru2 50.07(11) . . ?
C102 Ru1 Ru3 92.75(12) . . ?
C103 Ru1 Ru3 169.55(13) . . ?
C101 Ru1 Ru3 93.68(13) . . ?
C12 Ru1 Ru3 79.09(10) . . ?
Ru2 Ru1 Ru3 65.382(11) . . ?
C201 Ru2 C202 92.9(2) . . ?
C201 Ru2 C1 93.42(17) . . ?
C202 Ru2 C1 93.40(16) . . ?
C201 Ru2 C12 97.42(16) . . ?
C202 Ru2 C12 167.45(17) . . ?
C1 Ru2 C12 93.09(15) . . ?
C201 Ru2 Ru1 145.60(13) . . ?
C202 Ru2 Ru1 117.99(15) . . ?
C1 Ru2 Ru1 99.05(11) . . ?
C12 Ru2 Ru1 50.24(10) . . ?
C201 Ru2 Ru3 107.46(12) . . ?
C202 Ru2 Ru3 95.65(12) . . ?
C1 Ru2 Ru3 156.71(11) . . ?
C12 Ru2 Ru3 74.47(10) . . ?
Ru1 Ru2 Ru3 57.819(10) . . ?
C301 Ru3 C302 99.59(18) . . ?
C301 Ru3 C303 97.06(19) . . ?
C302 Ru3 C303 93.08(19) . . ?
C301 Ru3 C15 89.27(17) . . ?
C302 Ru3 C15 95.18(17) . . ?
C303 Ru3 C15 168.61(17) . . ?
C301 Ru3 Ru1 85.92(13) . . ?
C302 Ru3 Ru1 174.43(13) . . ?
C303 Ru3 Ru1 86.93(13) . . ?
C15 Ru3 Ru1 84.09(11) . . ?
C301 Ru3 Ru2 141.96(13) . . ?
C302 Ru3 Ru2 117.63(13) . . ?
C303 Ru3 Ru2 88.92(13) . . ?
C15 Ru3 Ru2 80.31(10) . . ?
Ru1 Ru3 Ru2 56.799(10) . . ?
 
_diffrn_measured_fraction_theta_max    0.986
_diffrn_reflns_theta_full              69.98
_diffrn_measured_fraction_theta_full   0.986
_refine_diff_density_max    0.510
_refine_diff_density_min   -0.793
_refine_diff_density_rms    0.110
